# Supplementary material for: A high-quality apple genome assembly reveals the association of a retrotransposon and red fruit colour
Source: Springer Nature journal article supplement (doi:10.1038/s41467-019-09518-x), 2019-04-02
Supplement: 41467_2019_9518_MOESM1_ESM.pdf [file 41467_2019_9518_MOESM1_ESM.pdf]

**A high-quality apple genome assembly reveals the  
association of a retrotransposon and red fruit colour**

*Zhang et al.*

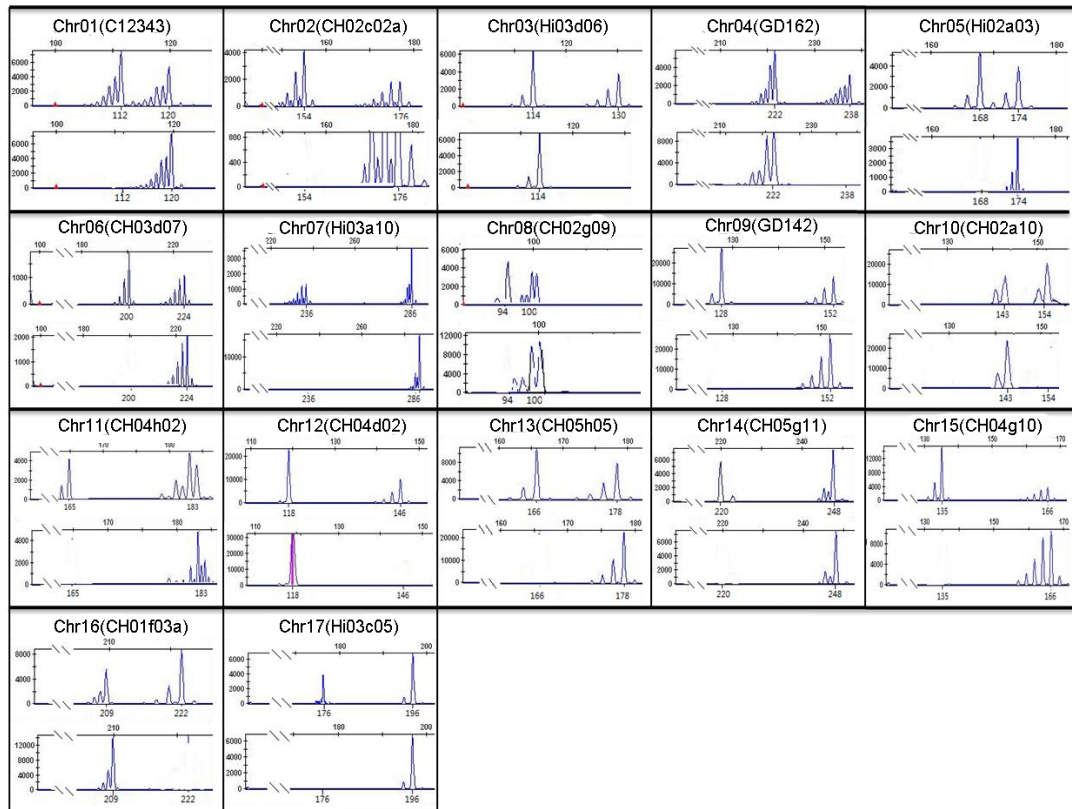

**Supplementary Figure 1.** Homozygosity analysis of HFTH1 and HFP using simple sequence repeats (SSRs) markers from the HIDRAS database (<http://www.hidras.unimi.it/>) by capillary electrophoresis with fluorescence detection. The x-axis shows the fragment size (bp) and the y-axis shows the peak height.

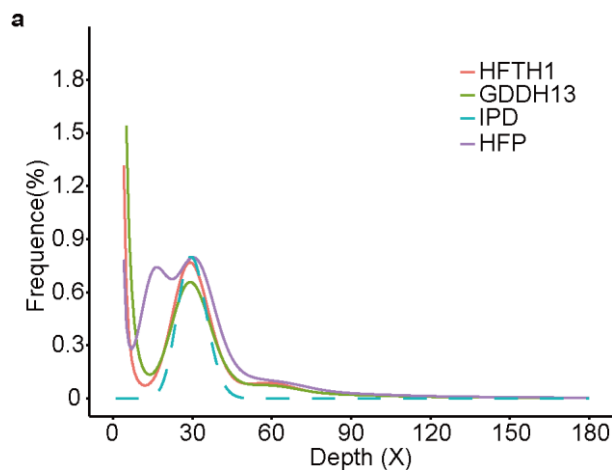

**Supplementary Figure 2.** Homozygosity analysis of the HFTH1 and GDDH13 genomes using Illumina reads. In the 17-mer depth distribution, the x-axis represents the k-mer depth, and the y-axis represents the frequency of k-mers. IPD, ideal Poisson distribution. HFP, heterozygous donor of HFTH1.

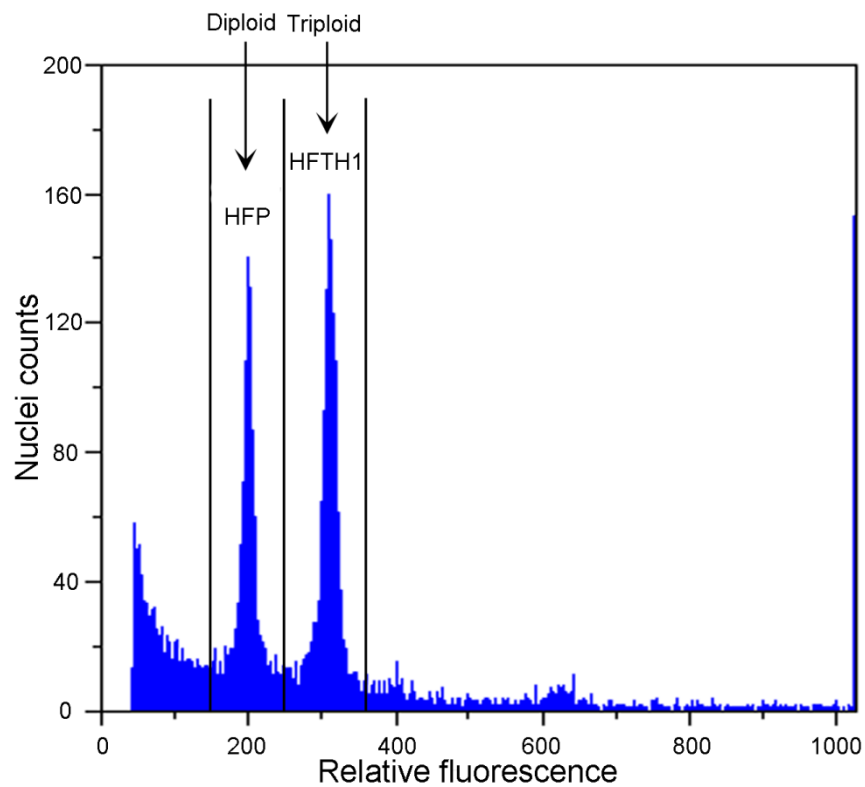

**Supplementary Figure 3.** Ploidy identification of HFTH1 and HFP by flow cytometry analysis. Source data are provided in Source Data file 1.

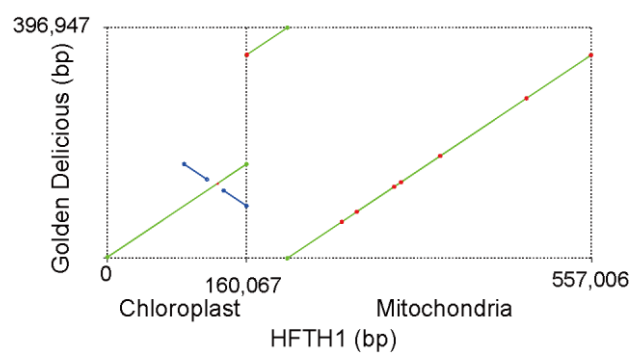

**Supplementary Figure 4.** Synteny view of two organelle genomes from Hanfu and Golden Delicious. The blue lines (left panel) represent two identical copies of a large inverted repeat (IR) sequence in the chloroplast genome. The red points (right panel) represent SNPs or indels at the current position. One point may contain multiple adjacent SNPs or indels.

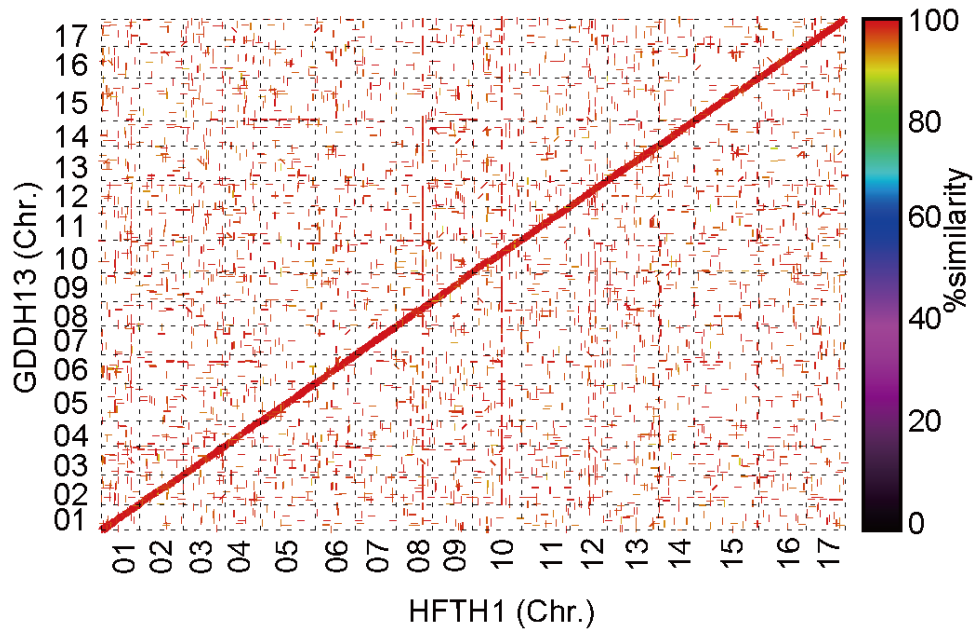

**Supplementary Figure 5.** Synteny view of the HFTH1 and GDDH13 genomes reveals a high degree of assembly consistency.

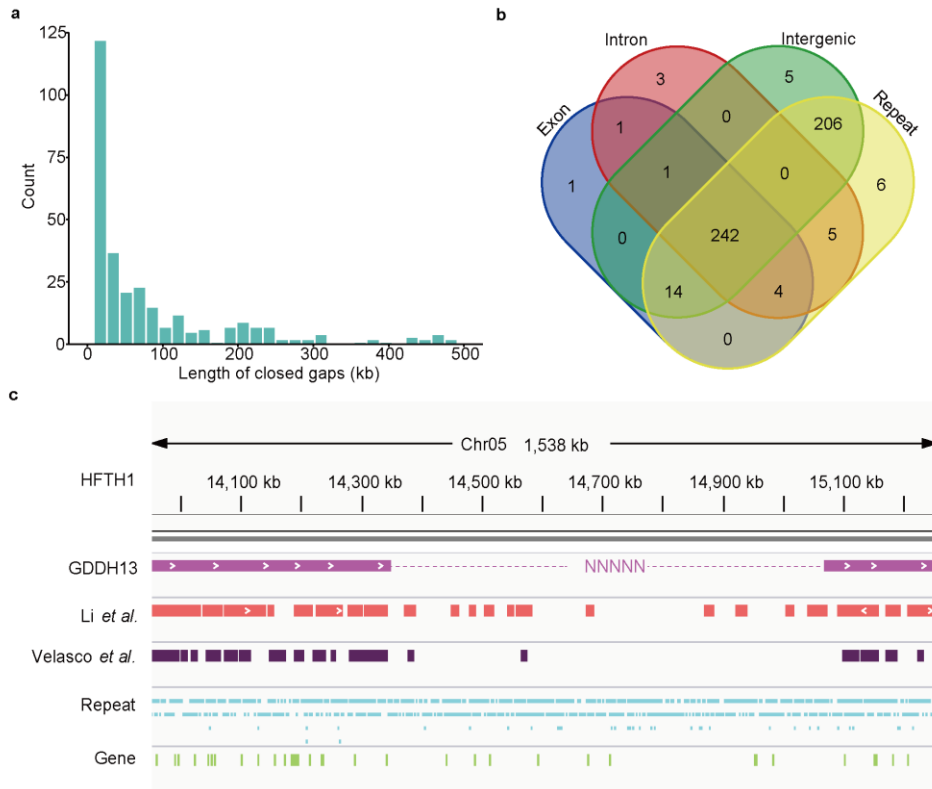

**Supplementary Figure 6.** Summary of gap filling in the GDDH13 genome. **(a)** Length distribution of all closed gaps in the GDDH13 genome. **(b)** Venn diagram of different classes of closed gaps in the GDDH13 genome. The class of a closed gap was defined basing on its overlapping elements. **(c)** Integrative Genomics Viewer screenshot of a 719,872 bp closed gap in the GDDH13 genome. Source data are provided in Source Data file 1.

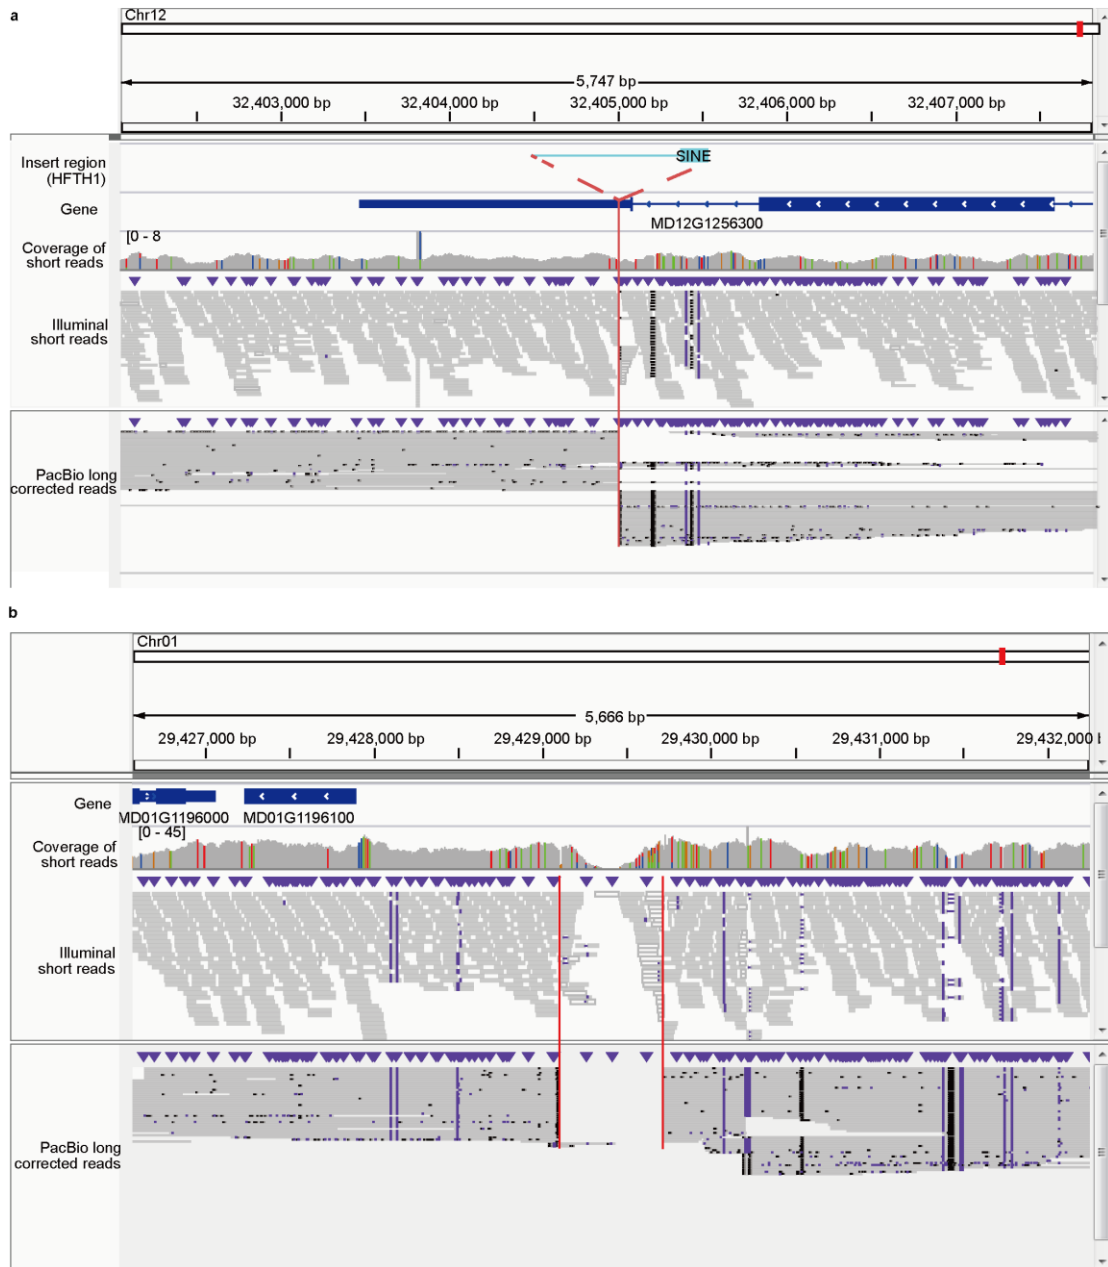

**Supplementary Figure 7.** Integrative genomics viewer screenshot of two structural variants. **(a)** Integrative genomics viewer screenshot of a 1,049 bp insertion in the GDDH13 genome. The PacBio and Illumina reads were from the HFTH1 genome, and the inserted sequence of the HFTH1 genome is shown at the top panel. **(b)** Integrative genomics viewer screenshot of a 625 bp insertion in the GDDH13 genome. PacBio and Illumina reads were obtained from the HFTH1 genome.

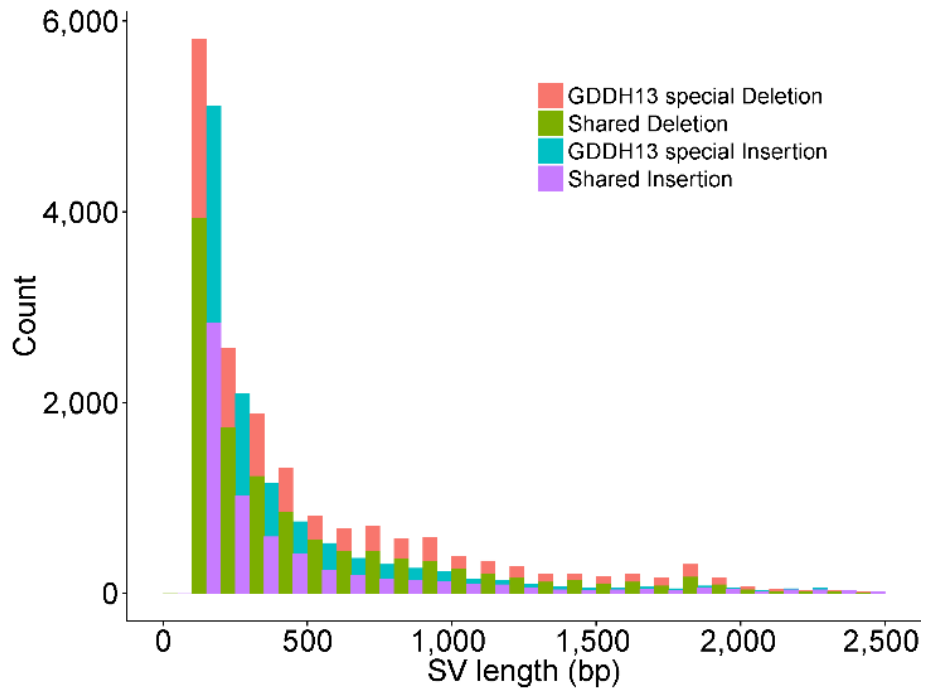

**Supplementary Figure 8.** Length distribution of structural variations. A special structural variation (deletion/insertion) indicates that it was only detected in the GDDH13 genome, while a shared structural variation (deletion/insertion) indicates that it was detected in all published genomes of Golden Delicious.

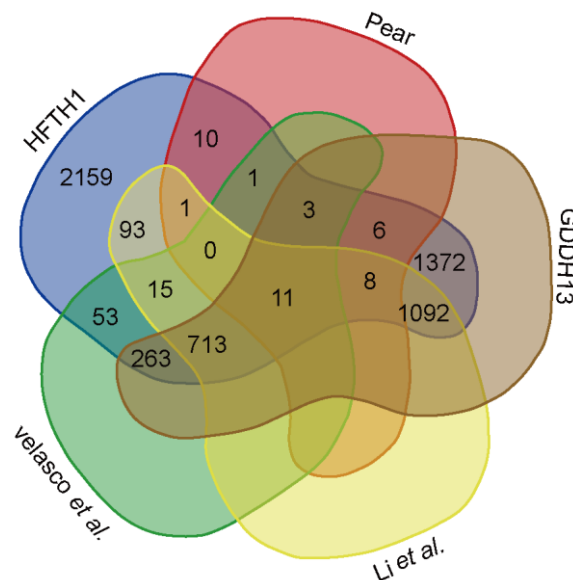

**Supplementary Figure 9.** Venn diagram showing the LTR-RTs in the HFTH1 genome amongst previously published assemblies of Golden Delicious and pear. The shared LTR-RTs may be underestimated because of the fragmented assembly.

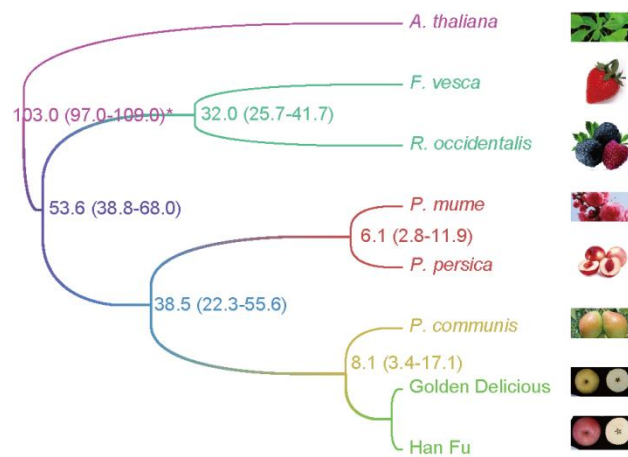

**Supplementary Figure 10.** Estimation of divergence time. The scale is in millions of years and 95% highest posterior density intervals are shown in brackets. The fossil-based divergence of *A. thaliana* and Rosaceae (103 MYR) was used for the calibration.



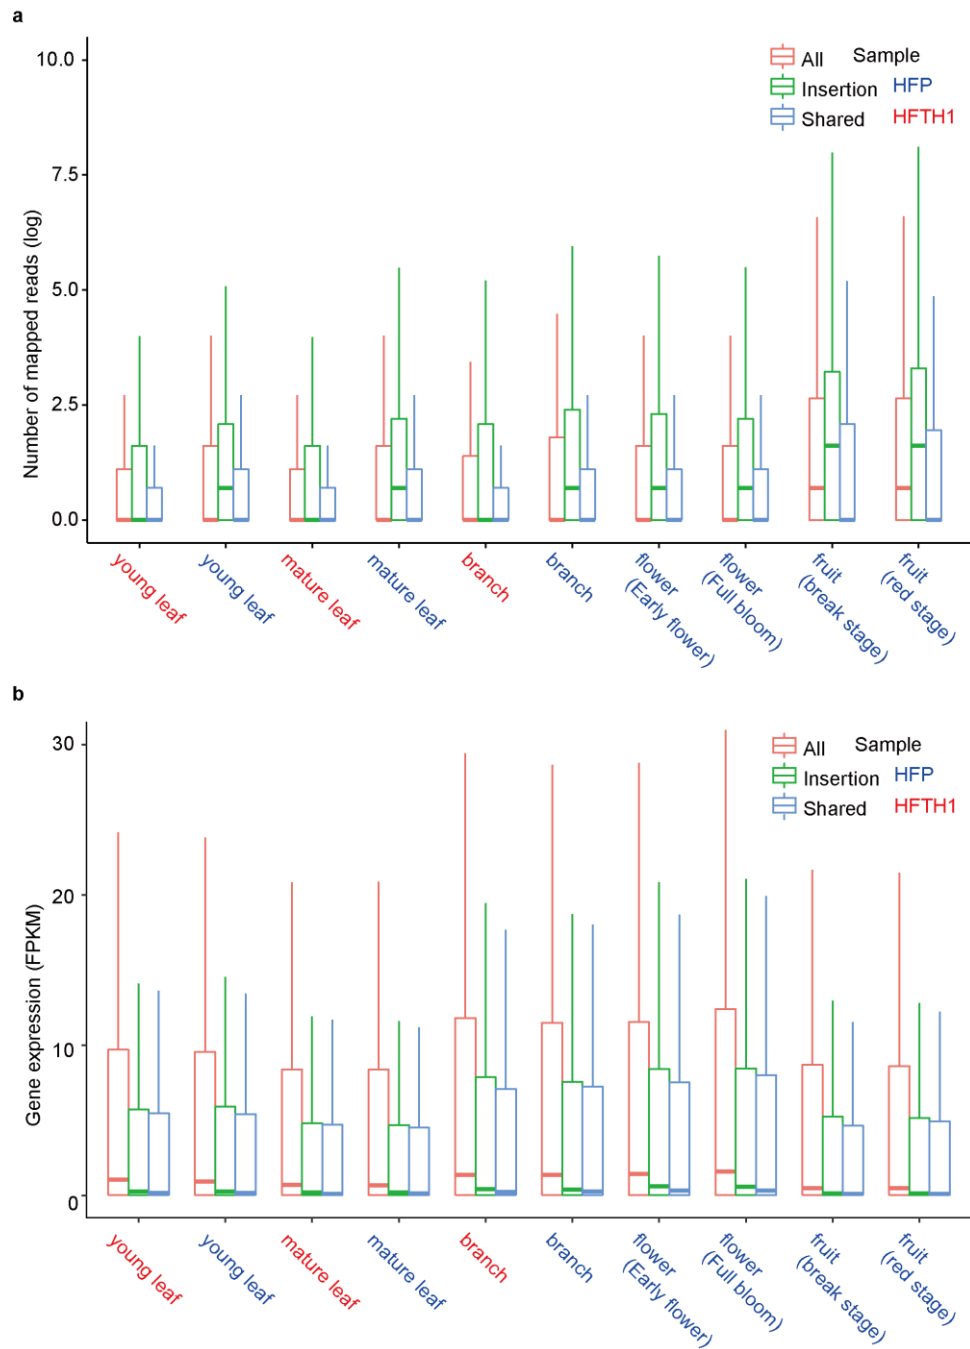

**Supplementary Figure 11.** Expression of LTR-RTs and nearby genes. **(a)** Expression of different types of LTR-RTs in 10 samples, and all represents the total LTR-RTs. **(b)** Expression of genes near LTR-RTs in 10 samples. Only the genes located within 5kb from LTR-RTs were selected. All represents the total gene set. The lower and upper hinges of all boxes correspond to the 25th and 75th percentiles; the whiskers represent the 1.5 inter-quartile range (IQR) extending from the hinges. Source data of Supplementary Data 11b are provided in Source Data file 1.

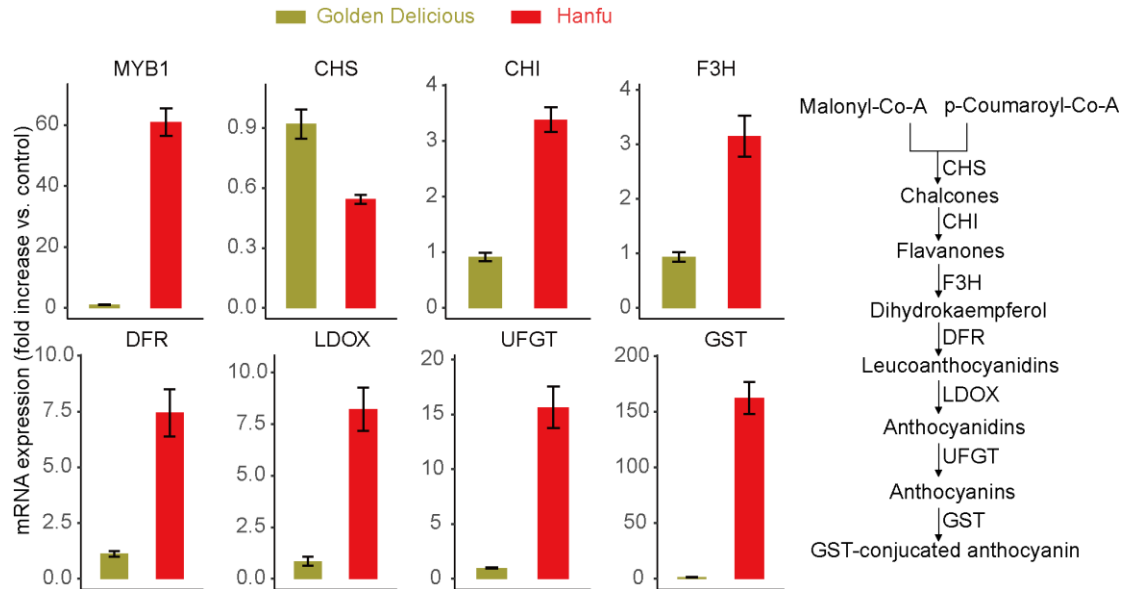

**Supplementary Figure 12.** Expression levels (left panel) of *MdMYB1* and structural genes involved in the anthocyanin biosynthetic pathway (right panel) in the peel of ripening fruits of Golden Delicious and Hanfu. CHS, chalcone synthase; CHI, chalcone isomerase; F3H, flavanone-3 b-hydroxylase. DFR, dihydroflavonol-4-reductase; LDOX, leucoanthocyanidin dioxygenase; UFGT, UDP-glycose flavonoid-3-O-glycosyltransferase; and GST, glutathione S-transferase. The mean and s.d. values from three independent experiments are shown. *MdActin* was used as a control. Source data are provided in Source Data file 1.



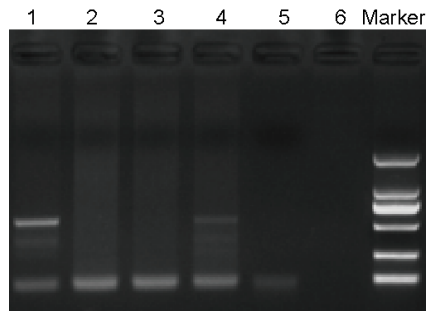

**Supplementary Figure 14.** PCR analysis of the 501 bp insertion. 1, McIntosh; 2, Hanfu; 3, Huayue; 4, Golden Delicious; 5, Water as template; 6, Blank; Marker, DL2000. Source data are provided in Source Data file 1.

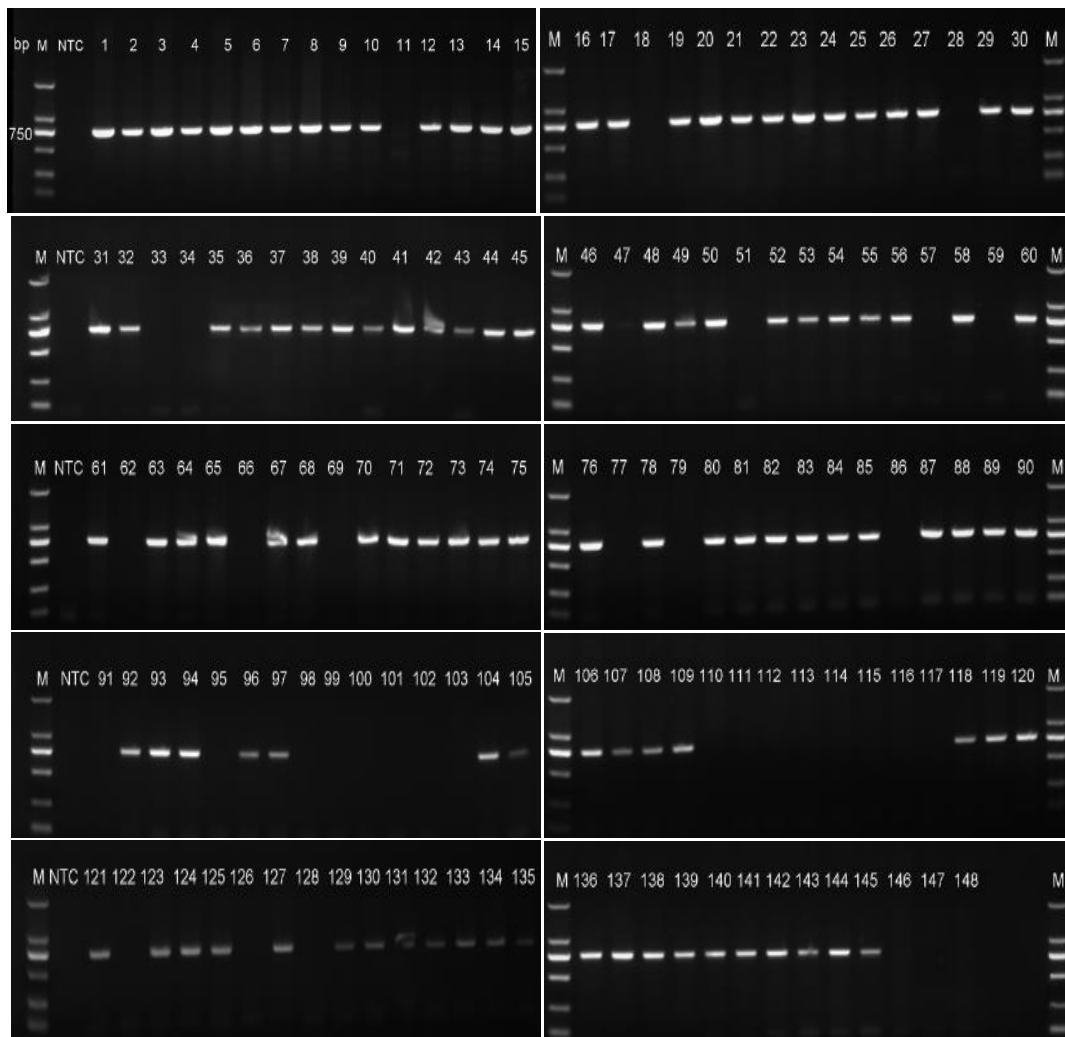

**Supplementary Figure 15.** PCR analysis of the RedTE-based marker in 148 accessions. Source data are provided in Source Data file 1.

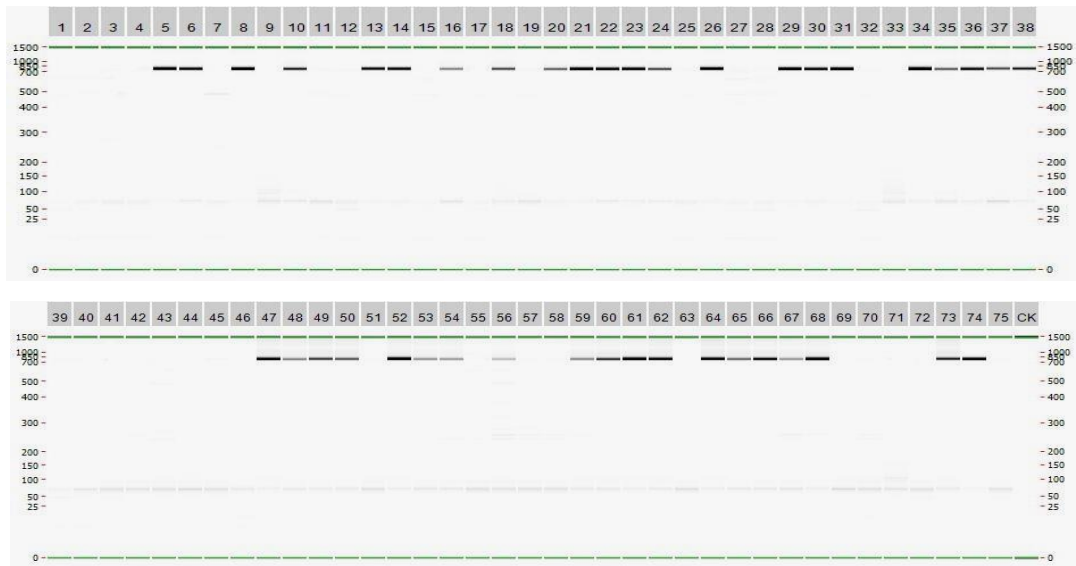

**Supplementary Figure 16.** Virtual gel-like photographs obtained from PCR analysis of the RedTE-based marker in 75 progenies of the cross of the Huayue (non red skin) and Honeycrisp (red skin) using a LabChip GX Touch instrument (1k-chip). Source data are provided in Source Data file 1.

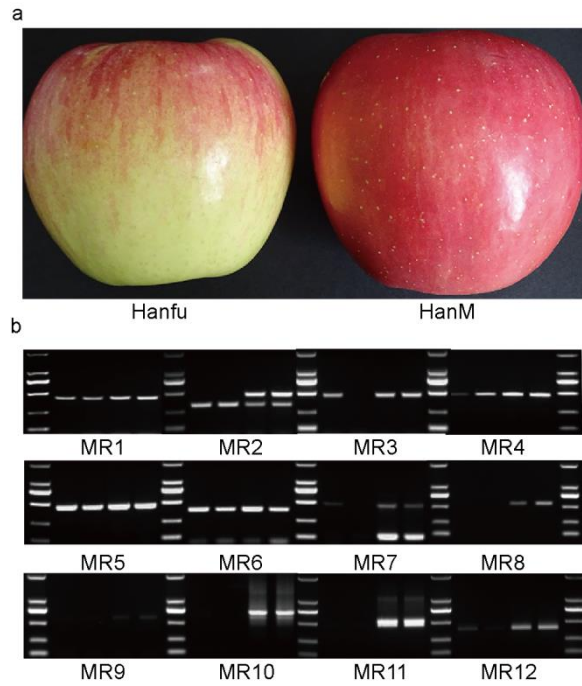

**Supplementary Figure 17.** DNA methylation status of redTE and the promoter region of *MdMYB1*. **(a)** Phenotypes of different red-skinned fruits of Hanfu (left) and its red sport HanM (right) at the ripening stage. Under the same condition, when the Hanfu fruits begins to colour, the HanM fruits has turned fully red. **(b)** McrBC-PCR identification DNA methylation levels of the promoter region of *MdMYB1* (MR1-MR7) and redTE transposon (MR8-MR12) between HanM and Hanfu. Lane1, 2, 3 and 4 indicated McrBC-treated DNA of HanM, McrBC-treated DNA of Hanfu, DNA of HanM without McrBC-treated, and DNA of Hanfu without McrBC-treated, respectively. Source data are provided in Source Data file 1.

**Supplementary Table 1.** Sequencing data sets generated in this study

|              | Sample | Tissue                          | Read type                             | Average Reads Length (bp) | Bases (bp)      | Base coverage     |
|--------------|--------|---------------------------------|---------------------------------------|---------------------------|-----------------|-------------------|
| Genome data  | HFTH1  | young leaf                      | Illumina, paired-end                  | 2 X 150                   | 43,339,156,500  | 65.62             |
|              | HFTH1  | young leaf                      | Illumina, paired-end (Hi-C libraries) | 2 X 100                   | 95,490,716,800  | 144.57            |
|              | HFTH1  | young leaf                      | PacBio, single-end                    | 13,107                    | 77,022,456,727  | 116.61            |
|              | HFTH1  | young leaf                      | Bionano                               | 178,908                   | 147,797,940,000 | 223.77            |
|              | HFP    | young leaf                      | Illumina, paired-end                  | 2 X 150                   | 50,752,481,700  | 76.84             |
|              | Sample | Tissue                          | Read Type                             | Average Reads Length (bp) | Bases (bp)      | Percent of Mapped |
| RNA-seq data | HFP    | fruit (break stage)             | Illumina, paired-end                  | 2 X 100                   | 19,877,666,800  | 95.84%            |
|              | HFP    | fruit (red stage)               | Illumina, paired-end                  | 2 X 100                   | 19,846,611,600  | 95.57%            |
|              | HFTH1  | young leaf                      | Illumina, paired-end                  | 2 X 150                   | 6,199,491,000   | 95.37%            |
|              | HFP    | young leaf                      | Illumina, paired-end                  | 2 X 150                   | 6,232,787,400   | 93.60%            |
|              | HFTH1  | mature leaf                     | Illumina, paired-end                  | 2 X 150                   | 6,206,832,000   | 94.86%            |
|              | HFP    | mature leaf                     | Illumina, paired-end                  | 2 X 150                   | 6,167,440,200   | 93.20%            |
|              | HFP    | branch                          | Illumina, paired-end                  | 2 X 150                   | 6,222,601,800   | 93.36%            |
|              | HFTH1  | branch                          | Illumina, paired-end                  | 2 X 150                   | 6,421,635,900   | 95.32%            |
|              | HFP    | flower (Early flowering period) | Illumina, paired-end                  | 2 X 150                   | 6,200,427,600   | 93.03%            |
|              | HFP    | flower (Full bloom period )     | Illumina, paired-end                  | 2 X 150                   | 6,166,718,700   | 92.99%            |

**Supplementary Table 2.** Assembly statistics of the HFTH1 genome

| Assembly                                               | Contigs  |            |                 | Scaffolds |            |                 |
|--------------------------------------------------------|----------|------------|-----------------|-----------|------------|-----------------|
|                                                        | N50 (kb) | No. of N50 | Total size (Mb) | N50 (kb)  | No. of N50 | Total size (Mb) |
| Pacbio <sup>a</sup>                                    | 4,628.41 | 48         | 656.52          | -         | -          | -               |
| Optical Map                                            | -        | -          | -               | 689.60    | 309        | 683.25          |
| PacBio + Optical Map                                   | 4,625.47 | 49         | 656.52          | 10,176.19 | 21         | 658.81          |
| PacBio + Optical Map + Gap-closure <sup>a,b</sup>      | 7,085.53 | 31         | 658.90          | 11,517.32 | 20         | 660.26          |
| PacBio + Optical Map + Gap-closure + Hi-C <sup>c</sup> | 6,988.12 | 32         | 658.90          | 37,138.69 | 8          | 660.50          |

<sup>a</sup>Including two steps polishing strategies using PacBio long reads and Illumina short reads.

<sup>b</sup>After removing the two organelle genomes.

<sup>c</sup>Three misassembled contigs were split according to the Hi-C map.

**Supplementary Table 3.** Comparison of genome features between the HFTH1 genome and other published genomes

|                                | HFTH1     | GDDH13   | Li et al. | Velasco et al. | TAIR10    | RGAP7     |
|--------------------------------|-----------|----------|-----------|----------------|-----------|-----------|
| Total genome length (Mb)       | 660.50    | 643.20   | 632.42    | 603.90         | 119.67    | 374.47    |
| Number of contigs              | 502       | 2,150    | 10,178    | 122,146        | 169       | 963       |
| Contig N50 (kb)                | 6,988.12  | 620.00   | 104.48    | 13.40          | 10,898.02 | 7,711.35  |
| Maximum contig length (kb)     | 18,010.64 | 2,368.17 | 958.42    | NA             | 14,600.99 | 17,510.76 |
| Complete BUSCOs of genome (%)  | 97.00     | 96.00    | 72.00     | NA             | 98.20     | 98.30     |
| TEs proportion (%)             | 59.78     | 57.96    | NA        | 42.40          | 10.00     | 35.00     |
| Annotated protein-coding genes | 44,677    | 42,140   | 53,922    | 63,141         | 27,416    | 39,045    |
| Complete BUSCOs of genes (%)   | 95.90     | 94.90    | 51.50     | 86.70          | 99.50     | 95.70     |

NA, not available.



**Supplementary Table 4.** Assessment of the quality of the HFTH1 genome with Illumina short reads

| Ref.   | Reads  | Total Reads | Pair Mapped |         | Singletons Mapped |         | Proper-pair Mapped |         |
|--------|--------|-------------|-------------|---------|-------------------|---------|--------------------|---------|
|        |        |             | Number      | Percent | Number            | Percent | Number             | Percent |
| GDDH13 | GDDH13 | 210,000,000 | 190,589,728 | 90.76%  | 2,689,424         | 1.28%   | 179,831,954        | 94.36%  |
| HFTH1  | HFTH1  | 140,000,000 | 135,358,604 | 96.68%  | 1,687,667         | 1.21%   | 133,611,170        | 98.71%  |
| HFTH1  | GDDH13 | 210,000,000 | 190,024,342 | 90.49%  | 2,894,939         | 1.38%   | 176,310,582        | 92.78%  |
| GDDH13 | HFTH1  | 140,000,000 | 134,201,132 | 95.86%  | 2,068,230         | 1.48%   | 125,152,002        | 93.26%  |

**Supplementary Table 5.** Assessment of the completeness of the apple genomes with ESTs

| Ref                   | Dataset* | Number  | Total Length(bp) | Sequence Covered by Assembly | Coverage rate > 90% in 1 Contig | Coverage rate > 50% in 1 Contig |
|-----------------------|----------|---------|------------------|------------------------------|---------------------------------|---------------------------------|
| Velasco <i>et al.</i> | All      | 326,941 | 158,164,334      | 98.14%                       | 92.13%                          | 97.30%                          |
|                       | >200     | 308,797 | 155,671,177      | 98.54%                       | 93.22%                          | 97.71%                          |
|                       | >1000    | 489     | 714,304          | 98.36%                       | 69.93%                          | 85.68%                          |
| Li <i>et al.</i>      | All      | 326,941 | 158,164,334      | 96.65%                       | 89.79%                          | 95.67%                          |
|                       | >200     | 308,797 | 155,671,177      | 97.14%                       | 90.90%                          | 96.16%                          |
|                       | >1000    | 489     | 714,304          | 97.75%                       | 69.32%                          | 84.45%                          |
| GDDH13                | All      | 326,941 | 158,164,334      | 97.84%                       | 91.61%                          | 96.71%                          |
|                       | >200     | 308,797 | 155,671,177      | 98.28%                       | 92.73%                          | 97.15%                          |
|                       | >1000    | 489     | 714,304          | 98.36%                       | 71.77%                          | 85.48%                          |
| HFTH1                 | All      | 326,941 | 158,164,334      | 98.02%                       | 92.54%                          | 97.10%                          |
|                       | >200     | 308,797 | 155,671,177      | 98.43%                       | 93.67%                          | 97.53%                          |
|                       | >1000    | 489     | 714,304          | 98.36%                       | 71.77%                          | 85.27%                          |

\*The ESTdata of apple was downloaded from NCBI.

**Supplementary Table 6. Comparisons of repeat elements identified in the HFTH1 and GDDH13 genomes**

| Type  | HFTH1         |                |                   | GDDH13   |                |                   |       |
|-------|---------------|----------------|-------------------|----------|----------------|-------------------|-------|
|       | Numbers*      | Length<br>(bp) | Percentage<br>(%) | Numbers* | Length<br>(bp) | Percentage<br>(%) |       |
| Total | 263,476       | 304,090,586    | 46.15             | 263,056  | 274,776,584    | 43.97             |       |
| Copia | 64,847        | 104,478,922    | 15.86             | 61,989   | 90,119,835     | 14.42             |       |
| Gypsy | 97,084        | 167,415,052    | 25.41             | 98,799   | 153,511,663    | 24.57             |       |
| LTR   | Caulimovirus  | 1,889          | 3,105,466         | 0.47     | 1,719          | 3,033,388         | 0.49  |
|       | Cassandra     | 5,714          | 2,474,135         | 0.38     | 6,013          | 2,390,885         | 0.38  |
|       | Caulimoviru   | 747            | 480,228           | 0.07     | 732            | 456,464           | 0.07  |
|       | Bel-Pao       | 66             | 559,592           | 0.08     | 52             | 461,201           | 0.07  |
|       | Other         | 93,129         | 25,577,191        | 3.88     | 93,752         | 24,803,148        | 3.97  |
|       | DNA           | 219,477        | 64,831,994        | 9.84     | 223,351        | 65,448,607        | 10.47 |
|       | Simple repeat | 75,968         | 12,377,737        | 1.88     | 72,341         | 11,152,163        | 1.78  |
| RC    | 13,958        | 3,510,647      | 0.53              | 11,508   | 3,311,031      | 0.53              |       |
| SINE  | 4,534         | 747,268        | 0.11              | 5,519    | 752,401        | 0.12              |       |
| LINE  | 27,725        | 30,357,558     | 4.61              | 24,808   | 27,737,398     | 4.44              |       |
| Other | 79921         | 13,423,085     | 1.99              | 85,255   | 13,841,797     | 2.22              |       |
| Total | 685,059       | 416,211,702    | 63.17             | 685,838  | 384,565,646    | 61.55             |       |

\*most repeats fragmented by insertions or deletions have been counted as one element.

**Supplementary Table 7. Part of the putative heterochromatin regions on the HFTH1 chromosomes**

| Chr   | Start      | End        | Percent of |                     |
|-------|------------|------------|------------|---------------------|
|       |            |            | Repeats    | Length of Chr. (bp) |
| Chr01 | 3,750,000  | 5,749,999  | 91.92%     | 32,944,118          |
| Chr02 | 23,000,000 | 25,999,999 | 92.17%     | 38,449,405          |
| Chr03 | 19,500,000 | 20,499,999 | 90.82%     | 37,138,690          |
| Chr04 | 13,000,000 | 14,749,999 | 91.21%     | 31,012,745          |
| Chr05 | 14,250,000 | 15,499,999 | 91.24%     | 47,891,858          |
| Chr06 | 12,000,000 | 16,249,999 | 91.23%     | 35,567,198          |
| Chr07 | 15,000,000 | 16,499,999 | 91.13%     | 35,934,761          |
| Chr08 | 16,750,000 | 18,249,999 | 91.72%     | 31,511,015          |
| Chr09 | 21,500,000 | 23,499,999 | 92.70%     | 34,800,404          |
| Chr10 | 13,500,000 | 15,249,999 | 92.19%     | 43,815,736          |
| Chr11 | 21,500,000 | 22,749,999 | 92.00%     | 42,456,296          |
| Chr12 | 12,750,000 | 13,999,999 | 91.36%     | 32,285,079          |
| Chr13 | 28,750,000 | 30,999,999 | 91.91%     | 44,866,511          |
| Chr14 | 12,250,000 | 13,249,999 | 95.58%     | 31,515,206          |
| Chr15 | 38,750,000 | 41,249,999 | 91.87%     | 56,644,392          |
| Chr16 | 29,500,000 | 30,499,999 | 91.42%     | 41,670,059          |
| Chr17 | 18,000,000 | 19,499,999 | 91.87%     | 33,998,825          |

**Supplementary Table 8.** Enriched InterPro domains for genes with non-synonymous SNPs

| InterPro ID | InterPro domain                                       | Pvalue   | Adjusted pvalue (FDR) |
|-------------|-------------------------------------------------------|----------|-----------------------|
| IPR002182   | Domain NB-ARC                                         | 4.06E-13 | 1.53E-09              |
| IPR000719   | Domain Protein kinase domain                          | 4.03E-08 | 7.61E-05              |
| IPR008808   | Domain Powdery mildew resistance protein, RPW8 domain | 1.21E-06 | 1.53E-03              |
| IPR001810   | Domain F-box domain                                   | 1.48E-05 | 1.00E-02              |

**Supplementary Table 9.** Enriched InterPro domains for genes associated with GDSVs

| InterPro ID | InterPro domain                                             | P-value  | Adjusted pvalue (FDR) |
|-------------|-------------------------------------------------------------|----------|-----------------------|
| IPR000157   | Domain Toll/interleukin-1 receptor homology (TIR) domain    | 5.38E-25 | 1.81E-22              |
| IPR011713   | Repeat Leucine-rich repeat 3                                | 2.85E-09 | 6.41E-07              |
| IPR003591   | Repeat Leucine-rich repeat, typical subtype                 | 9.34E-09 | 1.57E-06              |
| IPR026961   | Domain PGG domain                                           | 3.75E-05 | 5.05E-03              |
| IPR013187   | Domain F-box associated domain, type 3                      | 6.04E-05 | 6.79E-03              |
| IPR009737   | Family Thioredoxin-like ferredoxin                          | 7.23E-05 | 6.97E-03              |
| IPR001611   | Repeat Leucine-rich repeat                                  | 9.78E-05 | 8.24E-03              |
| IPR013894   | Domain RecQ mediated genome instability protein, N-terminal | 1.20E-04 | 9.02E-03              |
| IPR000454   | Family ATP synthase, F0 complex, subunit C                  | 3.92E-04 | 2.64E-02              |

**Supplementary Table 10.** Comparisons of the nucleotide differences of *MdMYB1*

| No. | Position<br>(Chr.09) | Base in the<br>HFTH1<br>genome | Base in the<br>GDDH13<br>genome | Data* used for ruling out the<br>associations of SNPs and indels with<br>fruit skin color |
|-----|----------------------|--------------------------------|---------------------------------|-------------------------------------------------------------------------------------------|
| 1   | 31,753,392           | T                              | C                               | SRR3571235, SRR3571267                                                                    |
| 2   | 31,753,311           | G                              | A                               | AB557640, AB557638, DQ886416, DQ886414,<br>DQ886415, EU518249, HQ259417, KX822763         |
| 3   | 31,753,264           | G                              | A                               | AB557640, AB557638, DQ886416, DQ886414,<br>DQ886415, EU518249, HQ259417, KX822763         |
| 4   | 31,753,223           | C                              | -                               | AB557640, AB557638, DQ886416, DQ886414,<br>DQ886415, EU518249, HQ259417, KX822763         |
| 5   | 31,753,172           | T                              | C                               | SRR3571267, SRR3571124, SRR3571143                                                        |
| 6   | 31,753,143           | A                              | G                               | SRR3571235, SRR3571267                                                                    |
| 7   | 31,753,094           | G                              | C                               | AB557640, AB557638, DQ886416, DQ886414,<br>DQ886415, EU518249, HQ259417, KX822763         |
| 8   | 31,753,075           | C                              | T                               | AB557640, AB557638, DQ886416, DQ886414, DQ<br>886415, EU518249, HQ259417, KX822763        |
| 9   | 31,752,948           | G                              | A                               | Granny_Smith                                                                              |
| 10  | 31,752,094           | G                              | A                               | Granny_Smith                                                                              |
| 11  | 31,752,086           | G                              | A                               | AB557640, AB557638, DQ886416, DQ886414,<br>DQ886415, EU518249, HQ259417, KX822763         |
| 12  | 31,752,073           | C                              | A                               | SRR3571185, SRR3571235                                                                    |
| 13  | 31,752,043           | A                              | T                               | AB557640, AB557638, DQ886416, DQ886414,<br>DQ886415, EU518249, HQ259417, KX822763         |
| 14  | 31,752,020           | T                              | C                               | SRR3571267, SRR3571243                                                                    |
| 15  | 31,751,924           | T                              | -                               | SRR3571267, SRR3571235                                                                    |
| 16  | 31,751,919           | T                              | A                               | SRR3571267, SRR3571235                                                                    |
| 17  | 31,751,009           | G                              | A                               | AB557640, AB557638, DQ886416, DQ886414,<br>DQ886415, EU518249, HQ259417, KX822763         |
| 18  | 31,750,919           | TT                             | -                               | AB557640, AB557638, DQ886416, DQ886414,<br>DQ886415, EU518249, HQ259417, KX822763         |
| 19  | 31,748,634           | T                              | C                               | AB557640, AB557638, DQ886416, DQ886414,<br>DQ886415, EU518249, HQ259417, KX822763         |

\*Data downloaded from NCBI (accession number) or GDR (<ftp.bioinfo.wsu.edu>).

**Supplementary Table 11.** Resequencing data from the cultivars at GDR\*

| Skin color | cultivars                                                                               |
|------------|-----------------------------------------------------------------------------------------|
| red        | Braeburn, Cox's Orange Pippin, Fuji, Red Delicious, Red Dougherty, McIntosh Summerland. |
| Non-red    | Golden Delicious, Goldrush, Granny Smith.                                               |

\* Data downloaded from ftp.bioinfo.wsu.edu.

**Supplementary Table 12.** Primer sequences used for McrBC-PCR analysis

| Gene name | Primer sequence (5'-3')                                      | location from ATG of MdMYB1 |
|-----------|--------------------------------------------------------------|-----------------------------|
| MR1       | GGTATCTTATGGTGGTCAAAGATG<br>CTTATCTGCTAGCAGCTAAGCTTA         | -440 to -3                  |
| MR2       | CTGAGATTGACTCTTGTGAAAGCT<br>GTGAATGCAGAATCGTGTAAGTAGT        | -856 to -383                |
| MR3       | TTAACGGAATCCAACGAAGACAAG<br>GCTACACCTAACACATTGCTCAAT         | -1246 to -780               |
| MR4       | TGAGATAGGTCCGGTTCTATTTCT<br>ATCCCTTTCCCTTATTTGTTCCGT         | -1657 to -1184              |
| MR5       | CAATTGCAGTGCTCAGAAATCGTT<br>CCGGACCCGTTTATAAATAGAACA         | -2044 to -1590              |
| MR6       | CCATTTCCACCGTTCATTTCTAAG<br>AACAGCAAACACCCAAAATCCCTT         | -2255 to -1872              |
| MR7       | CACTAGCTTCGGATTCCCTTAGGA<br>CGGTTTAGTTTCTGGGAATTCACA         | -2978 to -2501              |
| MR8       | GGATTGTTCCCTGCTGTCTCTCTGT<br>CCTAAGGAATCCGAAGCTAGTGAAGT      | -3515 to -2957              |
| MR9       | GTGCTGTTGATGCCAACGGAAGAT<br>GTCAACAGAGAGACAGCAGGAACAA        | -4172 to -3488              |
| MR10      | GCATCTCTCTATGGCCACGAAGAAC<br>TGCGCAAACCTCACAACCTTGAGATC      | -4749 to -4000              |
| MR11      | CTCCATATCGGCTTTATTGCCAAT<br>GTTCTTCGTGGCCATAGAGAGAT          | -5198 to -4725              |
| MR12      | CCAAAATTTAGTAGCGAAAACAACCTTTTC<br>GCCGATATGGAGAAATCCTGTTTGCT | -5594 To -5178              |

**Supplementary Table 13.** Probe sequences used for EMSA analysis

| Probe name   | Probe sequence (5'-3')    |
|--------------|---------------------------|
| CBF2BiotinF  | CTATCTATGCCGACTTAAGATATCA |
| CBF2BiotinR  | TGATATCTTAAGTCGGCATAGATAG |
| CBF2CF       | CTATCTATGCCGACTTAAGATATCA |
| CBF2CR       | TGATATCTTAAGTCGGCATAGATAG |
| CBF2BiotinMF | CTATCTATGTTATTGGAAGATATCA |
| CBF2BiotinMR | TGATATCTTCCAATAACATAGATAG |
